# Supplementary material for: A sensitive strategy for the fluorescence detection of DNA methyltransferase activity based on the graphene oxide platform and T7 exonuclease-assisted cyclic signal amplification
Source: Royal Society of Chemistry journal article supplement (doi:10.1039/c5an00417a), 2015-01-01
Supplement: c5an00417a1.pdf [file c5an00417a1.pdf]

## Electronic Supplementary Information (ESI)

### **A sensitive strategy for the fluorescent detection of DNA methyltransferase activity based on graphene oxide platform and T7 exonuclease-assisted signal amplification**

**Yefei Ma,<sup>a</sup> Lini Chen,<sup>a</sup> Liangliang Zhang,<sup>a\*</sup> Suqi Liao<sup>a</sup> and Jingjin Zhao<sup>a,b\*</sup>**

<sup>a</sup> *Key Laboratory for the Chemistry and Molecular Engineering of Medicinal Resources of Education Ministry, Guangxi Normal University, Guilin, 541004, China.*

<sup>b</sup> *Key Laboratory of Ecology of Rare and Endangered Species and Environmental Conservation of Education Ministry, Guangxi Normal University, Guilin 541004, China.*

*E-mail: liangzhang319@163.com (L. Zhang), jzhao12@163.com (J. Zhao)*

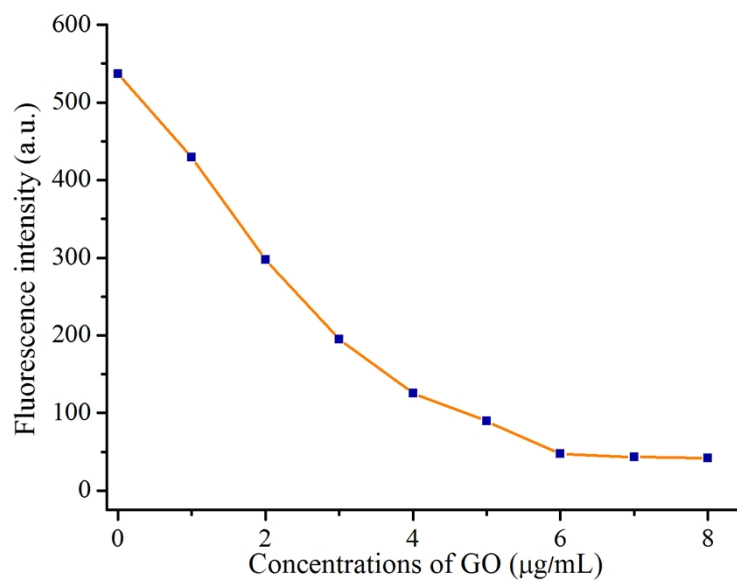

**Fig. S1** Fluorescence intensity of DP (250 nM) after addition of GO with different concentrations.

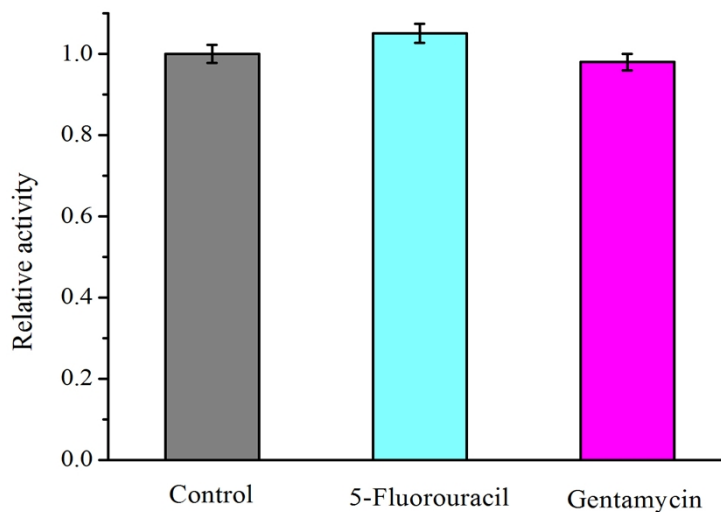

**Fig. S2** Influence of 5-fluorouracil and gentamycin on the activity of T7 Exo. The concentration for each drug was 100 µM.
